1 ***IN VITRO AND IN VIVO* CHARACTERISATION OF ISOLATES OF *CRYPTOCOCCUS NEOFORMANS* CAUSING**  
2 **MENINGITIS IN HIV INFECTED AND UNINFECTED PATIENTS IN VIETNAM**

3

4 Lam Tuan Thanh<sup>1</sup>, Dena Toffaletti<sup>2</sup>, Jennifer Tenor<sup>2</sup>, Charles Giamberardino<sup>2</sup>, Gregory D.  
5 Sempowski<sup>3</sup>, Yohannes Asfaw<sup>4</sup>, Hai Trieu Phan<sup>1</sup>, Anh Van Duong<sup>1</sup>, Trinh Mai Nguyen<sup>1</sup>, Lan Phu  
6 Huong Nguyen<sup>5</sup>, Chau Thi Hong Tran<sup>1</sup>, Philip M. Ashton<sup>1</sup>, Justin Beardsley<sup>1</sup>, Chau Van Vinh  
7 Nguyen<sup>6</sup>, Guy E. Thwaites<sup>1</sup>, Stephen Baker<sup>1</sup>, John R. Perfect<sup>2</sup>, Jeremy N. Day<sup>1,5</sup>

8

9 <sup>1</sup>Oxford University Clinical Research Unit, Hospital for Tropical Diseases, Ho Chi Minh City,  
10 Vietnam

11 <sup>2</sup>Division of Infectious Diseases, Department of Medicine and Department of Molecular  
12 Genetics and Microbiology, Duke University, North Carolina, USA

13 <sup>3</sup>Duke Human Vaccine Institute and Regional Biocontainment Laboratory, Duke University,  
14 North Carolina, USA

15 <sup>4</sup>Division of Laboratory Animal Resources, Duke University, North Carolina, USA

16 <sup>5</sup>Nuffield Department of Clinical Medicine, Centre for Tropical Medicine and Global Health,  
17 University of Oxford, Oxford, UK

18 <sup>6</sup>Hospital for Tropical Diseases, Ho Chi Minh City, Vietnam

19

20 **Corresponding author:** Jeremy N Day: [jday@oucru.org](mailto:jday@oucru.org)

21 **Running title:** Characterizing *Cryptococcus neoformans* from HIV uninfected patients

22 **Keywords**

23 Cryptococcal meningitis, *Cryptococcus neoformans*, MLST, immunocompetent, HIV-uninfected,  
24 HIV, A/J mice, ST5, phenotype

25 **Abstract**

26 Most cryptococcal meningitis occurs in immunocompromised individuals and is caused by  
27 *Cryptococcus neoformans* var. *grubii*. We previously reported cryptococcal meningitis in  
28 Vietnam arising atypically in HIV-uninfected, apparently immunocompetent patients, caused by  
29 a single amplified fragment length polymorphism (AFLP) cluster of *C. neoformans* (termed VNI-  
30  $\gamma$ ). This variant was less common in HIV-infected individuals. It is unclear why this lineage is  
31 associated with HIV-uninfected, apparently immunocompetent patients. To better delineate  
32 the phenotypic characteristics of *C. neoformans* VNI- $\gamma$  in comparison with other *C. neoformans*  
33 lineages we selected 30 representative isolates and compared their genotype-specific *in vitro*  
34 pathogenic potential and *in vivo* virulence, and ability to induce inflammatory response in the  
35 A/J mouse model. All isolates were genotyped using multi-locus sequence typing. All previously  
36 AFLP-defined VNI- $\gamma$  isolates were identified as sequence type (ST) 5. Compared with non-ST5  
37 strains, ST5 isolates had significantly increased variability in cell and capsule size ( $p < 0.001$ ). ST5  
38 and non-ST5 strains exhibited similar characteristics in relation to previously defined virulence  
39 factors including melanization, growth at 37°C, and growth in cerebrospinal fluid. However, A/J  
40 mice infected with ST5 isolates had significantly longer survival and lower fungal burdens at day  
41 7 and death compared with non-ST5 isolates. ST5 isolates induced significantly greater initial

42 inflammatory responses than non-ST5 strains, measured by TNF- $\alpha$  concentrations ( $p < 0.001$ ).  
43 Despite being generally less virulent in the mouse model, we hypothesize that the significant  
44 within strain variation seen in ST5 isolates in the tested phenotypes may represent an  
45 evolutionary advantage enabling adaptation to novel niches including apparently  
46 immunocompetent human hosts.

47

## 48 **Introduction**

49 Cryptococcal meningitis (CM) is a life-threatening fungal infection occurring in  
50 immunocompromised individuals including those with HIV infection, malignancy, organ failure,  
51 autoimmune disease and people receiving immunomodulatory therapy (1–3). Recent estimates  
52 indicate a global annual CM incidence in HIV infected patients of 223,100 cases, resulting in  
53 181,100 deaths (4). The burden of CM is highest in sub-Saharan Africa and South/Southeast  
54 Asia where there are substantially more people living with HIV/AIDS (4). *Cryptococcus*  
55 *neoformans* and *Cryptococcus gattii* are the two main etiologic agents for CM globally. *C. gattii*  
56 most often causes infection in apparently immunocompetent patients while *C. neoformans* is  
57 primarily responsible for disease in immunocompromised patients (5). In tropical and  
58 subtropical regions, *C. gattii* CM is relatively uncommon in HIV-infected patients, usually  
59 accounting for only 1-2% of cryptococcosis in HIV-infected individuals, though higher rates have  
60 been reported from Botswana and Malawi (up to 30% of all CM cases) (6, 7). Where CM due to  
61 *C. neoformans* var. *grubii* occurs in HIV-uninfected individuals, reports often describe patients  
62 with an increased disease susceptibility due to other underlying immunosuppressive conditions

63 (8, 9). However, reports of non-HIV CM from Australasia and the USA indicated no clear  
64 underlying immune deficit in approximately 20% of cases (10–12). In Vietnam, disease in HIV-  
65 uninfected patients accounts for approximately 10% of all CM cases admitted to our referral  
66 hospital in Ho Chi Minh City (HCMC) (13). We have previously reported that the majority of HIV-  
67 uninfected patients had no identified cause of immunosuppression, and that >80% of HIV-  
68 uninfected CM patients were infected by yeasts belonging to a single Amplified Fragment  
69 Length Polymorphism (AFLP)-defined cluster of *C. neoformans* var. *grubii*, which we had named  
70 VN1 $\gamma$ (14). Further phylogenetic characterization by multi-locus sequence typing (MLST)  
71 confirmed that the isolates from apparently immunocompetent patients were significantly  
72 associated with the monophyletic sequence type 5 lineage (ST5), and that all isolates from the  
73 VN1 $\gamma$  cluster were ST5 (15). Our clinical observation has been replicated in China where over  
74 70% of CM cases from apparently immunocompetent individuals were infected with *C.*  
75 *neoformans* (16, 17). The yeasts isolated from immunocompetent patients in China were  
76 closely related to each other and were all attributed to the ST5 genotype (18, 19). Similarly, this  
77 sequence type accounted for more than 80% of non-HIV-associated cases of CM in South Korea,  
78 although some patients from this group had other underlying, potentially immunosuppressive  
79 conditions (20). The association between a particular ST/genotype and host immune phenotype  
80 could be explained by a lineage-specific increase in pathogenic potential or microbial fitness, a  
81 currently unidentified host immune deficit, or a combination of these factors.

82 Here, in order to explore the hypothesis that ST5 strains have increased pathogenic potential,  
83 we compared their virulence phenotypes with non-ST5 strains in a range of *in vitro*  
84 experiments. Additionally, we used a mouse model of cryptococcosis to compare the relative *in*

85 *vivo* virulence of, and immune responses to, Vietnamese VN1 $\gamma$ /ST5 and non-VN1 $\gamma$ /ST5 clinical  
86 isolates.

## 87 **Material and methods**

### 88 ***C. neoformans* isolates and culture conditions**

89 We used clinical isolates obtained at the point of diagnosis, prior to antifungal therapy, from  
90 the cerebrospinal fluid (CSF) of patients enrolled in a prospective descriptive study of HIV-  
91 uninfected patients with central nervous system (CNS) infections, and a randomized controlled  
92 trial of antifungal therapy in HIV-infected patients (13, 21). All studies were approved by the  
93 Institutional Review Board of the Hospital for Tropical Diseases, Ho Chi Minh City, Vietnam and  
94 the Oxford Tropical Ethics Committee or Liverpool School of Tropical Medicine (UK). Bulk isolate  
95 from each patient was kept at -80°C using Microbank beads (Pro-Lab Diagnostics, UK). Isolates  
96 were single-colony-purified for all subsequent experiments. We randomly selected 15 isolates  
97 from our HIV uninfected cohort of patients. This resulted in 13 apparently immunocompetent  
98 patients (all infected with AFLP VN1 $\gamma$  strains) and 2 patients with underlying disease, infected  
99 with VN1 $\delta$  strains (15 in total). We then randomly selected 2 HIV patients with VN1 $\gamma$  infection  
100 and 13 HIV patients with VN1 $\delta$  infections, to deliver 30 isolates in total, 15 of each AFLP cluster.  
101 Mating type, AFLP fingerprints and 7-digits consensus MLST profiles (CAP59, GPD1, IGS1, LAC1,  
102 PLB1, SOD1, URA5) for all isolates were previously determined (15). *C. neoformans* yeasts were  
103 propagated using Yeast Peptone Dextrose (YPD) broth and incubated overnight at 30°C with  
104 agitation. Cells were harvested and washed 3 times in phosphate-buffered saline (PBS).

105 Inoculum was quantified using a Cellometer X2 cell-counter (Nexcelom Biosciences, USA).

106 Isolates and clinical information from corresponding patients were summarized in Table 1.

### 107 **Growth at high temperature, in *ex vivo* human CSF and melanin production**

108 Growth at high temperature and in *ex vivo* human CSF were tested as previously described (22)

109 with modifications for quantitative assessment. To assess fungal growth at different

110 temperatures, the inoculum was adjusted to  $10^8$  cells/ml, serially diluted and spot-inoculated in

111 duplicate on YPD agar in 5 $\mu$ l aliquots and incubated at 30°C or 37°C for 48 hours. After 48

112 hours, colony forming units (CFU) were counted and recorded in CFU/ml. For the *ex vivo* CSF

113 growth assay, baseline pre-antifungal treatment CSF supernatant from random de-identified

114 HIV-infected patients enrolled into an antifungal therapy trial was pooled, filtered, and stored

115 at -80°C until use. 10 $\mu$ l of  $10^8$  cells/ml yeast suspension was inoculated into 90 $\mu$ l of pooled CSF

116 and incubated at 37°C with 5%CO<sub>2</sub>. Inoculated CSF was serially diluted and spotted on YPD agar

117 at days 1 and 3 post-inoculation. All experiments were repeated in triplicate. The H99-derived

118 mutant *Δena1*, which lacks a cation-ATPase-transporter resulting in decreased viability in

119 human CSF and macrophages, was used as a negative control for the *ex vivo* CSF assay (23). H99

120 was included as a reference in all experiments. Data were standardized by expressing the

121 results as a ratio of the CFU/ml of the test isolate to the CFU/ml of H99. Melanin production

122 was assessed by plating 5 $\mu$ l of  $10^6$  cells/mL cell suspension on L-DOPA agar containing 1g/L L-

123 asparagine , 1g/L glucose, 3g/L KH<sub>2</sub>PO<sub>4</sub>, 250mg/L MgSO<sub>4</sub>.7H<sub>2</sub>O, 1mg/L Thiamine HCl, 5 $\mu$ g/L

124 Biotin, 100mg/L L-DOPA, 20g/L Bacto Agar (24, 25). Plates were incubated in the dark at 30°C or

125 37°C for 3 days. Differences in colony melanization were compared visually with reference to

126 H99 and an H99-derived mutant with diminished melanization in L-DOPA agar from the  
127 Perfect lab.

### 128 **Extracellular urease and phospholipase activity**

129 Extra-cellular urease production was semi-quantified using Christensen's agar. 10 $\mu$ l of 10<sup>8</sup>  
130 cells/ml yeast suspension was spotted on Christensen's agar and incubated at room  
131 temperature. The time to complete plate colouration was determined using a GoPro Hero 6  
132 camera (Gopro, USA) using the time-lapse setting set with a 1 minute interval. *C. neoformans*  
133 H99 was used as a positive control and *Candida albicans* as a negative control. Extracellular  
134 phospholipase activity was screened on egg yolk medium as previously described, with minor  
135 modifications (26). The egg yolk medium contained Sabouraud agar with 1M sodium chloride,  
136 0.005M calcium chloride and 8% sterile egg yolk enrichment (Merck, USA). A 5  $\mu$ l aliquot of *C.*  
137 *neoformans* yeast suspension (10<sup>8</sup> cells/ml) was spotted on egg yolk agar and incubated at 30°C  
138 for 72 hours. The diameters of the precipitation zone (D) formed around the colonies and of the  
139 respective colonies (d) were recorded after 72 hours incubation. The D/d ratio for each isolate  
140 was calculated. H99 was included for reference in each experimental batch. The final result for  
141 each isolate was expressed as the ratio between the test isolate's D/d ratio and that of H99. All  
142 isolates were tested in triplicate for each phenotype.

143

### 144 ***In vitro* capsule and cell size measurement**

145 To measure *in vitro* cryptococcal capsule thickness, all isolates were streaked onto capsule-  
146 inducing agar containing powdered Dulbecco Modified Eagle Medium (DMEM) [supplemented

147 with 4.5g/L glucose, L-glutamine, sodium pyruvate], NaHCO<sub>3</sub> 250mM, NaMOPS 1M, Neomycin  
148 200mg/ml, Cefotaxime 100 mg/ml (27). Plates were incubated at 37°C in 5% CO<sub>2</sub> until single  
149 colonies were visible. Unless otherwise specified, all reagents were purchased from Sigma-  
150 Aldrich. India ink smears from a single yeast colony were prepared on a glass slide and  
151 visualized at 100X magnification using a CX41 microscope (Olympus, Japan). Images of single  
152 microscopic yeast cells were captured using a DP71 Camera system with DP Controller software  
153 (Olympus, Japan) and processed using ImageJ ([rsb.info.nih.gov/ij/](http://rsb.info.nih.gov/ij/)). Capsular thickness was  
154 calculated by subtracting yeast cell body diameter ( $D_{CD}$ , no capsule) from whole cell diameter  
155 ( $D_{WC}$ , including capsule). At least 30 individual microscopic yeast cells were assessed for each  
156 isolate.

#### 157 **Mouse inhalation infection model of cryptococcosis**

158 All mouse infection experiments were conducted as previously described according to Duke  
159 University's Institutional Animal Care and Use Committee guidelines and approvals(28).  
160 Six-week old female A/J mice were sedated with isoflurane and inoculated intranasally with the  
161 selected *C. neoformans* var. *grubii* isolate by dropping 25µl of yeast suspension containing  
162  $5 \times 10^4$  cells into the nares. Eight isolates were randomly selected from the 30 for murine  
163 experiments. The isolates were five ST5 (BK147 and BK44 from HIV infected patients and  
164 BMD700, BMD1338 and BMD1646 from HIV uninfected patients) and three non-ST5 strains  
165 (BMD1415 (ST4) and BMD1367 (ST306) from HIV uninfected patients and BK80 (ST4) from an  
166 HIV infected patient). Animals were monitored daily and euthanized by CO<sub>2</sub> inhalation at  
167 indicated time points (fungal burden and *in vivo* responses) or until weight loss  $\geq$  15% body  
168 weight was observed (virulence assay).



169 **Determining *in vivo* fungal burden**

170 Five mice were infected with each isolate in two independent experiments for assessment of  
171 fungal burden at 7 or 14 days post-infection. All animals in each experiment set were  
172 euthanized by CO<sub>2</sub> inhalation either on day 7 or day 14 post-infection. Fungal burden at each  
173 time point was assessed by excising the left superior lobe of the lung and brain and  
174 homogenizing the tissue by bead beating. Tissue homogenate was serially diluted and plated  
175 onto YPD agar supplemented with 100mg/ml ampicillin. The plates were incubated at 30°C for  
176 48 hours and the number of *C. neoformans* colony forming units (CFU) recorded. Fungal  
177 burdens were expressed as CFU per gram of tissue (CFU/g). At each time point, additional lung  
178 lobes were also collected for determining *in vivo* histopathology and cytokine response, as  
179 described below. In addition, fungal burdens were separately determined at the point of death  
180 in animals from the survival assays described below.

181 **Determining *in vivo* histopathology**

182 At specific time points (7 or 14 days post-infection, as described above), the right superior lung  
183 lobe from each mouse was excised and immersed in 10% formalin (replaced with 70% ethanol  
184 after 24 hours) for fixation. Fixed, uninflated lung specimens were stored at 4°C until further  
185 processing. After paraffin embedding, sliced sections were stained using the periodic acid-Schiff  
186 (PAS) or mucicarmine stains. Histopathological examination was performed by an independent  
187 pathologist blinded to infecting strain. Tissue damage was scored from 0 (no changes) to 10  
188 (severe changes), corresponding to the severity of pathology in 4 different categories: necrosis,

189 hemorrhage, edema and inflammation, as per the Duke Veterinary Diagnostic Laboratory  
190 (Division of Laboratory Animal Resources).

### 191 **Determining *in vivo* cytokine response**

192 To assess the severity of the inflammatory responses at specific time points (day 7 and day 14  
193 post-infection), the middle lobe from the right lung of each infected mouse was excised and  
194 homogenized by bead beating in 1ml sterile PBS/Protease inhibitor. 500µl of lung homogenate  
195 was used for cytokine profiling. Cytokines representing T-helper type 1 (Th1) (IL-12p70, TNF-α,  
196 IFN-γ), T-helper type 17 (IL-17) and T-helper type 2 (Th2) (IL-4, IL-5, IL-10) responses were  
197 measured using a customized Bio-Plex Pro™ Mouse Cytokine Th1/Th2 Assay kit (Biorad, USA)  
198 with the BioPlex 200 platform according to the manufacturer's guidelines. Data were retrieved  
199 using BioPlex Manager Software. The upper and lower limits of quantification (ULOQ and LLOQ)  
200 were based on a standard curve. All values falling below the LLOQ were replaced with the  
201 midpoint between zero and the LLOQ. Data were standardized by lung weight and presented as  
202 picogram of cytokines per gram lung tissue (pg/g).

### 203 ***In vivo* virulence assay**

204 The virulence assay was conducted independently from the day 7/day 14 experiment. Each of  
205 the 8 selected isolates was inoculated intranasally into 10 A/J mice. Mice were monitored daily  
206 until death, or loss of more than 15% body weight (impending death), at which point they were  
207 euthanized by CO<sub>2</sub> inhalation, necropsied and had fungal burden in lung and brain determined.

## 208 **Statistical analysis**

209 GraphPad Prism version 5.04 for Windows (GraphPad Software, San Diego California USA;  
210 [www.graphpad.com](http://www.graphpad.com)) was used for data visualization and statistical analyses of fungal loads,  
211 cytokine profiling, capsular/cell size, and survival proportions. The Mann-Whitney U-test was  
212 used for comparing fungal load and cytokine concentrations. Kaplan-Meier survival curves and  
213 the log-rank test were used for survival analysis. Capsule/cell size was compared using Welch's  
214 t-test. The Fligner-Killeen test of variance homogeneity for analyzing variation in capsule/cell  
215 size and Fisher's exact test were performed using R software, version 3.2.4 ([http://www.r-](http://www.r-project.org)  
216 [project.org](http://www.r-project.org)). One way ANOVA with post hoc multiple comparison tests (Dunnett or Bonferroni)  
217 was used to compare cytokine concentrations between individual isolates.

## 218 **Results**

### 219 **ST5 *C. neoformans* isolates have increased capsule size and variability.**

220 We compared the following *in vitro* virulence phenotypes of ST5 and non-ST5 isolates: capsule  
221 size, extracellular urease and phospholipase production, melanin production, growth at high  
222 temperature, and in pooled human CSF. ST5 *C. neoformans* yeast cells developed significantly  
223 thicker capsules during *in vitro* culture than non-ST5 isolates (Table 2). Individual ST5 *C.*  
224 *neoformans* cells were also significantly larger in size than cells from the non-ST5 strains (Figure  
225 1 and Table 2), and there was greater variation in both capsule size and cell diameter within ST5  
226 compared with other sequence types (Figure 1,  $p < 0.0001$ , Fligner-Killeen test). One particular  
227 ST5 strain, BMD1646, was markedly larger and with thicker capsules than other isolates.  
228 However, the differences in capsule thickness and cell diameter between sequence types, as

229 well as the variation among ST5 isolates, remained statistically significant even when this  
230 isolate was removed from the analysis (data not shown).

231 In contrast, there were no genotype-specific differences in the other *in vitro* phenotypes tested:  
232 growth at 30°C ( $p=0.10$ ) and 37°C ( $p=0.23$ ); *ex vivo* survival in CSF after 1-day ( $p=0.72$ ) or 3-days  
233 exposure ( $p=0.77$ , see Supplementary Figures S1 and S2), extracellular urease activity and  
234 phospholipase activity (Supplementary Figures S3 and S4). Specific phenotyping data for the 8  
235 isolates used for mice infection experiments are shown in Supplementary Figures S5, S6 and S7.

### 236 **ST5 isolates from are less virulent than non-ST5 isolates in experimental mice infection**

237 We tested the hypothesis that the higher prevalence of ST5 infection in apparently healthy  
238 hosts was associated with higher virulence in intranasally-inoculated A/J mice. Mice infected  
239 with ST5 strains were associated with significantly longer survival times than mice infected with  
240 non-ST5 strains ( $p<0.0001$ , Figure 2). However, there was significant variability in the effect of  
241 individual yeast strains of the same sequence type on survival (Supplementary Figure S8).  
242 Notably, two ST5 strains (BK147 and BMD1646) appeared to be substantially attenuated in  
243 comparison to other ST5 strains, with mice infected with these strains surviving up to 40 days.  
244 However, the differences in survival times between mice infected with ST5 and non-ST5 strains  
245 remained significant when these two isolates were removed from the analysis ( $p=0.003$ , log-  
246 rank test, data not shown).

247 All strains successfully established lung infection and disseminated to the brain as early as day  
248 7. Tissue-specific fungal burden data are presented in Table 3. Non-ST5 strain infections  
249 resulted in higher lung fungal burdens than ST5 infections at all time-points (for day 7,  $p<0.001$ ;

250 for day 14  $p < 0.0001$ ; and  $p < 0.0001$  at the point of sacrifice (see also Figure 3)). Again, these  
251 data were not driven by the two severely attenuated isolates (BK147 and BMD1646) as the  
252 fungal loads associated with ST5 infections remained low even when they were excluded from  
253 the analysis (data not shown). The majority of mice infected with BMD1646 (ST5) and BK147  
254 (ST5) became sterile and therefore lung fungal burdens in these animals remained low up to  
255 day 14 (see Supplementary Figure S9 for fungal burden by individual strain). Brain fungal  
256 burdens were higher in non-ST5 strains at all time points but this was statistically significant  
257 only at the point of sacrifice ( $p$  values 0.054, 0.36 and 0.01, Mann-Whitney test, for days 7, 14  
258 and point of sacrifice respectively).

259 ***C. neoformans* isolates from HIV-uninfected patients induce higher levels of pro-inflammatory**  
260 **TNF- $\alpha$  production in the lungs of infected mice**

261 We next measured the cytokine concentrations in lung homogenates at days 7 and 14 post-  
262 infection (Figure 4). TNF- $\alpha$  concentrations were significantly higher in ST5 infections than in  
263 non-ST5 strain infections ( $p = 0.01$ ; also see Table 4). Of note, the highest day 7 lung TNF- $\alpha$   
264 concentrations were seen in the two ST5 strains that were most attenuated in the mouse  
265 survival model (BK147 and BMD1646), and the lowest TNF- $\alpha$  concentrations were measured in  
266 the most virulent ST5 isolate in the mouse model (BMD1338).

267 By day 14, mean TNF- $\alpha$  concentrations associated with the ST5 strains had declined from  
268 3933.71 pg/g lung to 2802.36 pg/g lung ( $p < 0.001$ ). Other Th-1 cytokines including IL-12, IL-17  
269 and IFN- $\gamma$  also decreased in ST5-infected mice between days 7 and 14 ( $p < 0.001$ ,  $p < 0.01$  and  
270  $p = 0.02$ , respectively). This contrasted with non-ST5 strain infections, in which mean TNF- $\alpha$   
271 levels increased from 3256.25 pg/g to 6378.76 pg/g ( $p = 0.02$ , also see Table 4) over this time

272 period. However, the high concentration of TNF- $\alpha$  measured in non-ST5 strain infections at day  
273 14 was driven by a single isolate - BMD1415; TNF- $\alpha$  concentrations in the lung in mice infected  
274 with this isolate were significantly higher than for infections with any other isolate of any  
275 lineage ( $p < 0.001$ ). There were no statistically significant differences in TNF- $\alpha$  concentrations at  
276 day 14 between lineages when this isolate was excluded from the analysis. The same  
277 BMD1415-driven pattern also occurred when comparing IFN- $\gamma$  and IL-17 concentrations at day  
278 14. The concentrations of these two cytokines in BMD1415-infected mice appeared significantly  
279 higher than in mice infected with any other isolate ( $p < 0.001$ , Supplementary Figure S10).  
280 However, IL-12 concentrations fell in non-ST5-infected mice, including BMD1415, between day  
281 7 and 14 (4 fold decrease,  $p < 0.0001$ ) (Figure 5).

282 We measured the TNF- $\alpha$ :IL-10 ratio as a proxy marker of the relationship between a Th-1 and a  
283 Th-2 response (29). From day 7 to day 14 post-infection, the TNF- $\alpha$ :IL-10 ratio decreased by a  
284 factor of 0.78 in mice infected with ST5 isolates, while those infected with non-ST5 strains  
285 exhibited an increase in the ratio of 1.25 fold. However, when BMD1415 (ST4) was excluded  
286 from the analysis the TNF- $\alpha$ :IL-10 ratio in non-ST5 infected mice also decreased by a factor of  
287 0.67. By day 14 we detected elevated concentrations of IL-17 and IFN- $\gamma$  in non-ST5 infected  
288 mice (5-fold and 17-fold increments, respectively (Table 4), but not in ST5 infected mice. Again,  
289 this effect was largely associated with BMD1415, since the concentrations of IL-17 and IFN- $\gamma$   
290 induced by this isolate at day 14 were significantly higher than for all others ( $p < 0.001$ , see also  
291 Supplementary Figure S10).

## 292 **Histopathological examination**

293 Histological examination of infected lung tissue revealed evidence of inflammation,  
294 hemorrhage, edema and necrosis in most cases. These changes were generally greater by day  
295 14 in comparison to day 7. There were no clear differences in histological scores between  
296 sequence types, other than strain BMB1646 (ST5) which had only mild inflammation with no  
297 necrosis or hemorrhage seen (Supplementary Figure S11). PAS staining revealed extensive  
298 perivascular infiltration of leukocytes in mice tissue associated with both infecting genotypes  
299 (BMD1338-ST5 and BMD1415-ST4, Figure 6). We did not measure genotype-specific capsule  
300 size *in vivo*, but ST5 yeasts appeared to be more extensively encapsulated than ST4 yeasts in  
301 the lung sections, especially by day 14 (Figures 6 and Figure 7).

## 302 **Discussion**

303 Most cases of cryptococcal meningitis in HIV uninfected, apparently immunocompetent,  
304 patients in Vietnam and East Asia are due to *C. neoformans* strains of multi-locus sequence type  
305 5 (ST5) (14–16, 18, 30–32). This phenomenon could be explained either by ST5 strains being  
306 intrinsically more pathogenic, or due to unidentified lineage-specific host immune defects or  
307 exposures. It is unlikely that the high prevalence of ST5 infection observed in HIV-uninfected  
308 patients is explained by a significantly greater prevalence of the lineage in the environment  
309 since it causes only 35% of cases in HIV-infected patients within the same geographical area  
310 (14). Furthermore, data from China suggest that ST5 strains are significantly less prevalent in  
311 the environment, making up only 5% of isolates recovered in a recent study (33). We  
312 investigated the first hypothesis by comparing previously identified *in vitro* virulence-associated

313 phenotypes, along with murine *in vivo* virulence and immune responses, between lineages. All  
314 isolates were derived from HIV infected or uninfected Vietnamese patients with cryptococcal  
315 meningitis.

316 The comparison by MLST defined lineage is appropriate because ST5 is a coherent and distinct  
317 group. It precisely aligns with the AFLP VNI- $\gamma$  cluster, and whole genome sequence data reveals  
318 that there are few intra-lineage genomic variations between ST5 strains (15). Furthermore, it is  
319 unlikely that any phenotypic variations among ST5 isolates are primarily attributable to *subtle*  
320 intra-lineage genomic variations since phenotypic and genotypic diversity are not tightly  
321 coupled in *C. neoformans var. grubii* (34). Due to the fact that ST5 has been shown to be  
322 consistently associated with the clinical phenotype of interest (infection of HIV-uninfected  
323 patients), and that strains from HIV uninfected patients are dispersed throughout the VNI- $\gamma$ /ST5  
324 cluster, we believe the ability to infect apparently immunocompetent hosts is common to all  
325 ST5 isolates. Therefore grouping strains by multi-locus sequence type for phenotypic  
326 comparison was logical and likely to provide biological insights.

327 We found that isolates from all STs were able to grow in *ex vivo* human CSF and at 37°C -  
328 essential characteristics for establishing human CNS infection. While these qualities would be  
329 needed for disease in both HIV infected and immunocompetent patients, it might have been  
330 expected that ST5 strains would grow more rapidly in these conditions. The lack of ST-specific  
331 differences in these phenotypes suggests that the ability to establish disease in HIV-  
332 uninfected/immunocompetent patients is not driven by simple adaptations to these conditions.



333 However, ST5 cells were significantly larger than non-ST5 cells, had thicker capsules *in vitro*, and  
334 had more within lineage variation in these characteristics. Capsule size and composition are  
335 known to vary during infection and under specific stress conditions (35, 36), influencing  
336 macrophage phagocytosis and modulating host immune response (36–39), and in human  
337 disease, *ex vivo* capsule size has been associated with higher intracranial pressures, slower  
338 yeast clearance and attenuated inflammation (38). While we did not formally measure yeast cell  
339 or capsule size in our *in vivo* experiments, mucicarmine staining was suggestive that capsules  
340 were indeed larger during mouse infection. It is possible that the ability of ST5 strains to cause  
341 infections in immunocompetent patients is a function of increased responsiveness to capsule-  
342 inducing conditions. Further investigation of genotype-specific characteristics of *in vitro* and *in*  
343 *vivo* capsular polysaccharide production, composition, and morphology, may elucidate a  
344 specific role in ST5-associated pathogenesis. Of note, cryptococcal virulence factors frequently  
345 have additional metabolic functions; the increased cell and capsule size seen in ST5 isolates  
346 may be a side effect of other processes involving capsular-biosynthesis genes (for example  
347 carbon source sensing, sugar transport and spore formation) (40, 41).

348 Our data indicate that phenotypic heterogeneity may be a hallmark characteristic of the ST5  
349 lineage. Heterogeneity is a desirable trait for microbial populations under selection pressure  
350 allowing the exploitation of, and survival, in novel niches (42). Chow *et al* (2008) has previously  
351 reported that ST5 *C. neoformans* var. *grubii* possesses unique genomic features which may  
352 drive niche adaptation (43). We speculate that the phenotypic heterogeneity associated with  
353 strains from the ST5 lineage is a strategy that facilitates successful colonization of novel

354 environmental niches, and facilitates the exploitation of infrequent specific human immune  
355 deficits.

356 However, paradoxically, we found no evidence that ST5 isolates have greater virulence in the  
357 mouse model. There are several possible explanations. First, virulence in mice is variable  
358 depending on mouse breed and may not accurately reflect the immunological heterogeneity of  
359 the human population (44). Second, yeasts with different pathogenic potentials, associated  
360 with their isolation from different sources (i.e. clinical versus environmental,  
361 immunocompromised versus immunocompetent patients) may have the same or paradoxical  
362 pathogenic potential in experimental animal models. An example is *Cryptococcus gattii* which is  
363 associated with infection in immunocompetent patients and therefore is considered to be more  
364 fit in the human host than *C. neoformans*. However, the hypervirulent *C. gattii* strain R265,  
365 responsible for the on-going Vancouver outbreak, has similar virulence in both C57BL/6 and A/J  
366 mice to the *C. neoformans* H99 strain, which was derived from a patient with Hodgkin's disease  
367 on chemotherapy (45). Third, the A/J mouse breed is not immunologically intact; it may be an  
368 imperfect model of infection for immunocompetent hosts (46). Rather, A/J mice may be a  
369 better model of disease in immunosuppressed patients, as they are highly susceptible to  
370 cryptococcal disease, and the patterns of cytokine expression in mice with disseminated  
371 cryptococcosis are similar to those seen in HIV-infected patients with CM (47). Consistent with  
372 this, we could not detect clinical differences in disease course or outcome between HIV patients  
373 infected with ST5 versus other strains in Vietnam (15). Models that better mimic infection in  
374 immunocompetent hosts are needed.

375 We did identify lineage specific differences in immune response in the mouse model. Previous  
376 research has suggested that a Th1 type immune response, defined by the TNF- $\alpha$ /IL-10 ratio, is  
377 protective, and a Th2 response is associated with poor outcomes (48, 49). We found no  
378 evidence of genotype-specific differences in TNF- $\alpha$ /IL-10 ratios by lineage in the murine  
379 infection model. Rather, we found higher initial (day 7) TNF- $\alpha$  concentrations in mice infected  
380 with ST5 isolates, suggesting this genotype elicits a more intense initial inflammatory response.  
381 Previous studies have suggested that capsule components, or cryptococcal cells themselves,  
382 have a dose-dependent ability to stimulate TNF- $\alpha$  production by various immune effector cells  
383 (50, 51). The more robust initial inflammatory response we observed may have been due to the  
384 ST5 capsular phenotype. Previously, it has been suggested that the ability of *C. gattii* to cause  
385 disease in apparently immunocompetent patients is because it induces a less severe  
386 inflammatory response compared with other cryptococcal species (45). The robust initial  
387 inflammatory responses seen in our murine infection experiments are not consistent with this  
388 being the mechanism underlying the ability of ST5 *C. neoformans* var. *grubii* organisms to cause  
389 disease in the immunocompetent.

390 *In vivo* controlled infection studies in mice, including ours, commonly employ the classic  
391 definition of pathogenicity as the microbe's capability to cause disease in a susceptible host,  
392 whereas virulence corresponds to the severity of the ensuing pathology (52). Using the same  
393 infective dose for all strains we failed to demonstrate that ST5 strains had greater virulence.  
394 The difference we observe in prevalence of different lineages in immunocompetent and  
395 immunosuppressed humans may actually represent specific differences in pathogenicity - the

396 ability of the organisms to colonize the host and establish infection. We could not assess this  
397 with our experimental system.

398 In summary, our cohort of ST5 *Cryptococcus* isolates displayed two notable phenotypes. First,  
399 despite their well documented ability to cause disease in HIV uninfected humans, they  
400 appeared to be less virulent in a murine model than the other sequence types, as demonstrated  
401 by reduced fungal burdens in tissue and prolonged mouse survival. Second, ST5 strains had  
402 larger capsules and cell sizes than the other genotypes, and greater variability in this phenotype  
403 throughout the lineage. These data lead us to the following conclusions. First, clinical isolates,  
404 which have by their nature already undergone selection within the human host, can possess  
405 wide variability in the expression of virulence phenotypes within a single lineage. Secondly, the  
406 use of host risk factors and immune phenotypes to derive an understanding of the factors that  
407 drive the pathogenicity of *Cryptococcus neoformans* may be more complex than anticipated.  
408 Associations may be difficult to make due to the relevance of the particular *in vitro* phenotypes,  
409 the animal models used, within strain heterogeneity, and population substructure. Moreover,  
410 there may be heterogeneity in the immune response of apparently immunocompetent patients  
411 which selects particular sub-cohorts of isolates of the same lineage. Laboratory phenotyping of  
412 larger numbers of clinical isolates is needed to define the lineage-specific differences that  
413 determine different human disease phenotypes.

414 Finally, it is possible that the categorization of strains into specific clades with limited genetic  
415 information such as MLST may lack precision to understand the relative fitness of specific  
416 strains in the human host. It is likely that whole genome sequencing will provide better  
417 mapping of the relationships between strains and virulence.

418 **Conclusions**

419 In this study, we demonstrated genotype-specific differences in *in vitro* and *in vivo* virulence  
420 phenotypes between *C. neoformans* var. *grubii* strains isolated from host with different  
421 immune status. However, there was also significant variation among strains isolated from  
422 apparently immunocompetent patients in specific *in vitro* and *in vivo* phenotypes tested. This  
423 higher rate of phenotypic variation may represent an evolutionary strategy for *C. neoformans*  
424 var. *grubii* to take advantage of novel niches and contribute to their ability to infect apparently  
425 immunocompetent hosts, despite generally being less virulent in a mammalian animal model.  
426 Furthering the understanding of the pathogenesis of cryptococcal meningitis will require  
427 investigation of large numbers of strains with associated robust clinical information, and the  
428 development of high throughput laboratory phenotypic studies that have clinical relevance in  
429 humans.

430 **Acknowledgements**

431 Supported by a Wellcome Trust Intermediate Fellowship awarded to JND (WT097147MA). SB is  
432 a Sir Henry Dale Fellow, jointly funded by the Wellcome Trust and the Royal Society  
433 (100087/Z/12/Z). Multiplex cytokine profiling was performed in the Immunology Unit of the  
434 Duke Regional Biocontainment Laboratory, which received partial support for construction  
435 from the US National Institutes of Health, National Institute of Allergy and Infectious Diseases  
436 (UC6-AI058607). The study was approved by the scientific committee of the Hospital for  
437 Tropical Diseases, Ho Chi Minh City, Vietnam.

438 **References**

- 439 1. Fang W, Chen M, Liu J, Hagen F, MS A, Al-Hatmi, Zhang P, Guo Y, Boekhout T, Deng D, Xu  
440 J, Pan W, Liao W. 2016. Cryptococcal meningitis in systemic lupus erythematosus  
441 patients: pooled analysis and systematic review. *Emerg Microbes Infect* 5:e95.
- 442 2. Schmalzle SA, Buchwald UK, Gilliam BL, Riedel DJ. 2016. *Cryptococcus neoformans*  
443 infection in malignancy. *Mycoses* 59:542–552.
- 444 3. Williamson PR, Jarvis JN, Panackal AA, Fisher MC, Molloy SF, Loyse A, Harrison TS. 2016.  
445 Cryptococcal meningitis: epidemiology, immunology, diagnosis and therapy. *Nat Rev*  
446 *Neurol* 13:13–24.
- 447 4. Rajasingham R, Smith RM, Park BJ, Jarvis JN, Govender NP, Chiller TM, Denning DW,  
448 Loyse A, Boulware DR. 2017. Global burden of disease of HIV-associated cryptococcal  
449 meningitis: an updated analysis. *Lancet Infect Dis* 17:873–881.
- 450 5. Kwon-Chung KJ, Fraser JA, Doering TL, Wang ZA, Janbon G, Idnurm A, Bahn YSY-S. 2014.  
451 *Cryptococcus neoformans* and *Cryptococcus gattii*, the etiologic agents of cryptococcosis.  
452 *Cold Spring Harb Perspect Med* 4:a019760.
- 453 6. Steele KT, Thakur R, Nthobatsang R, Steenhoff AP, Bisson GP. 2010. In-hospital mortality  
454 of HIV-infected cryptococcal meningitis patients with *C. gattii* and *C. neoformans*  
455 infection in Gaborone, Botswana. *Med Mycol*.
- 456 7. Litvintseva AP, Thakur R, Reller LB, Mitchell TG. 2005. Prevalence of clinical isolates of  
457 *Cryptococcus gattii* serotype C among patients with AIDS in Sub-Saharan Africa. *J Infect*  
458 *Dis* 192:888–892.

- 459 8. Pappas PG. 2013. Cryptococcal infections in non-HIV-infected patients. *Trans Am Clin*  
460 *Climatol Assoc* 124:61–79.
- 461 9. Shih CC, Chen YC, Chang SC, Luh KT, Hsieh WC. 2000. Cryptococcal meningitis in non-HIV-  
462 infected patients. *QJM* 93:245–251.
- 463 10. Chen S, Sorrell T, Nimmo G, Speed B, Currie B, Ellis D, Marriott D, Pfeiffer T, Parr D, Byth  
464 K. 2000. Epidemiology and host- and variety-dependent characteristics of infection due  
465 to *Cryptococcus neoformans* in Australia and New Zealand. Australasian Cryptococcal  
466 Study Group. *Clin Infect Dis* 31:499–508.
- 467 11. Mitchell DH, Sorrell TC, Allworth AM, Heath CH, McGregor AR, Papanoum K, Richards  
468 MJ, Gottlieb T. 1995. Cryptococcal disease of the CNS in immunocompetent hosts:  
469 Influence of cryptococcal variety on clinical manifestations and outcome. *Clin Infect Dis*  
470 20:611–616.
- 471 12. Pappas PG, Perfect JR, Cloud G, Larsen R, Pankey G, Lancaster DJ, Henderson H,  
472 Kauffman C, Haas DW, Saccante M, Hamill RJ, Holloway MS, Warren RM, Dismukes WE.  
473 2001. Cryptococcosis in human immunodeficiency virus-negative patients in the era of  
474 effective azole therapy. *Clin Infect Dis* 33:690–9.
- 475 13. Chau TT, Mai NH, Phu NH, Nghia HD, Chuong L V, Sinh DX, Duong V a, Diep PT, Campbell  
476 JI, Baker S, Hien TT, Lalloo DG, Farrar JJ, Day JN. 2010. A prospective descriptive study of  
477 cryptococcal meningitis in HIV uninfected patients in Vietnam - high prevalence of  
478 *Cryptococcus neoformans* var. *grubii* in the absence of underlying disease. *BMC Infect Dis*  
479 10:199.

- 480 14. Day JN, Hoang TN, Duong A V, Hong CTT, Diep PT, Campbell JI, Sieu TPM, Hien TT, Bui T,  
481 Boni MF, Laloo DG, Carter D, Baker S, Farrar JJ. 2011. Most cases of cryptococcal  
482 meningitis in HIV-uninfected patients in Vietnam are due to a distinct amplified fragment  
483 length polymorphism-defined cluster of *Cryptococcus neoformans* var. *grubii* VN1. J Clin  
484 Microbiol 49:658–64.
- 485 15. Day JN, Qihui S, Thanh LT, Trieu PH, Van AD, Thu NH, Chau TTH, Lan NPHH, Chau NVV,  
486 Ashton PM, Thwaites GE, Boni MF, Wolbers M, Nagarajan N, Tan PBOO, Baker S. 2017.  
487 Comparative genomics of *Cryptococcus neoformans* var. *grubii* associated with  
488 meningitis in HIV infected and uninfected patients in Vietnam. PLoS Negl Trop Dis  
489 11:e0005628.
- 490 16. Chen J, Varma A, Diaz M. 2008. *Cryptococcus neoformans* strains and infection in  
491 apparently immunocompetent patients, China. Emerg Infect Dis 14.
- 492 17. Li Z, Liu Y, Cao H, Huang S, Long M. 2017. Epidemiology and clinical characteristics of  
493 cryptococcal meningitis in China ( 1981-2013 ): A review of the literature. Med Mycol  
494 Open Access 3:1–6.
- 495 18. Fan X, Xiao M, Chen S-L, Kong F, Dou H-T, Wang H, Xiao Y-L, Kang M, Sun Z-Y, Hu Z-D,  
496 Wan Z, Chen S-L, Liao K, Chu Y-Z, Hu T-S, Zou G-L, Hou X, Zhang L, Zhao Y-P, Xu Y-C, Liu Z-  
497 Y. 2016. Predominance of *Cryptococcus neoformans* var. *grubii* multilocus sequence type  
498 5 and emergence of isolates with non-wild-type minimum inhibitory concentrations to  
499 fluconazole: a multi-centre study in China. Clin Microbiol Infect 22:887.e1-887.e9.
- 500 19. Dou H-T, Xu Y-C, Wang H-Z, Li T-S. 2014. Molecular epidemiology of *Cryptococcus*



- 501 *neoformans* and *Cryptococcus gattii* in China between 2007 and 2013 using multilocus  
502 sequence typing and the DiversiLab system. Eur J Clin Microbiol Infect Dis 34:753–62.
- 503 20. Choi YH, Ngamskulrungraj P, Varma A, Sionov E, Hwang SM, Carriconde F, Meyer W,  
504 Litvintseva AP, Lee WG, Shin JH, Kim E-C, Lee KW, Choi TY, Lee YS, Kwon-Chung KJ. 2010.  
505 Prevalence of the VNlc genotype of *Cryptococcus neoformans* in non-HIV-associated  
506 cryptococcosis in the Republic of Korea. FEMS Yeast Res 10:769–78.
- 507 21. Day JN, Chau TTH, Wolbers M, Mai PP, Dung NT, Mai NH, Phu NH, Nghia HD, Phong ND,  
508 Thai CQ, Thai LH, Chuong L V, Sinh DX, Duong V a, Hoang TN, Diep PT, Campbell JI, Sieu  
509 TPM, Baker SG, Chau NV V, Hien TT, Laloo DG, Farrar JJ, Ph D, Chau TTH, Wolbers M,  
510 Pham P, Mai PP, Dung NT, Mai NH, Phu NH, Nghia HD, Phong ND, Thai CQ, Thai LH,  
511 Chuong L V, Sinh DX, Duong V a, Hoang TN, Diep PT, Campbell JI, Sieu TPM, Baker SG,  
512 Chau NV V, Hien TT, Laloo DG, Farrar JJ. 2013. Combination antifungal therapy for  
513 cryptococcal meningitis. N Engl J Med 368:1291–302.
- 514 22. Lee A, Toffaletti DL, Tenor J, Soderblom EJ, Thompson JW, Moseley MA, Price M, Perfect  
515 JR. 2010. Survival defects of *Cryptococcus neoformans* mutants exposed to human  
516 cerebrospinal fluid result in attenuated virulence in an experimental model of meningitis.  
517 Infect Immun 78:4213–25.
- 518 23. Idnurm A, Walton FJ, Floyd A, Reedy JL, Heitman J. 2009. Identification of ENA1 as a  
519 virulence gene of the human pathogenic fungus *Cryptococcus neoformans* through  
520 signature-tagged insertional mutagenesis. Eukaryot Cell 8:315–26.
- 521 24. Salas SD, Bennett JE, Kwon-Chung KJ, Perfect JR, Williamson PR. 1996. Effect of the

- 522 laccase gene CNLAC1, on virulence of *Cryptococcus neoformans*. J Exp Med 184:377–386.
- 523 25. Eisenman HC, Mues M, Weber SE, Frases S, Chaskes S, Gerfen G, Casadevall A. 2007.
- 524 *Cryptococcus neoformans* laccase catalyses melanin synthesis from both D- and L-DOPA.
- 525 Microbiology 153:3954–3962.
- 526 26. Chen SC, Muller M, Zhou JZ, Wright LC, Sorrell TC. 1997. Phospholipase activity in
- 527 *Cryptococcus neoformans*: a new virulence factor? J Infect Dis 175:414–420.
- 528 27. Zaragoza O, Casadevall A. 2004. Experimental modulation of capsule size in *Cryptococcus*
- 529 *neoformans*. Biol Proced Online 6:10–15.
- 530 28. Hu G, Cheng P-Y, Sham A, Perfect JR, Kronstad JW. 2008. Metabolic adaptation in
- 531 *Cryptococcus neoformans* during early murine pulmonary infection. Mol Microbiol
- 532 69:1456–75.
- 533 29. Levitz SM, Tabuni A, Nong SH, Golenbock DT. 1996. Effects of interleukin-10 on human
- 534 peripheral blood mononuclear cell responses to *Cryptococcus neoformans*, *Candida*
- 535 *albicans*, and lipopolysaccharide. Infect Immun 64:945–51.
- 536 30. Fang W, Fa Z, Liao W. 2014. Epidemiology of *Cryptococcus* and cryptococcosis in China.
- 537 Fungal Genet Biol.
- 538 31. Khayhan K, Hagen F, Pan W, Simwami S, Fisher MC, Wahyuningsih R, Chakrabarti A,
- 539 Chowdhary A, Ikeda R, Taj-Aldeen SJ, Khan Z, Ip M, Imran D, Sjam R, Sriburee P, Liao W,
- 540 Chaicumpar K, Vuddhakul V, Meyer W, Trilles L, van Iersel LJJ, Meis JF, Klaassen CHW,
- 541 Boekhout T. 2013. Geographically structured populations of *Cryptococcus neoformans*
- 542 variety *grubii* in Asia correlate with HIV status and show a clonal population structure.

- 543 PLoS One 8:e72222.
- 544 32. Chen M, Xu Y, Hong N, Yang Y, Lei W, Du L, Zhao J, Lei X, Xiong L, Cai L, Xu H, Pan W, Liao  
545 W. 2018. Epidemiology of fungal infections in China. *Front Med* 12:58–75.
- 546 33. Dou H, Wang H, Xie S, Chen X, Xu Z, Xu Y. 2017. Molecular characterization of  
547 *Cryptococcus neoformans* isolated from the environment in Beijing, China. *Med Mycol*  
548 38:1–11.
- 549 34. Beale MA, Sabiiti W, Robertson EJ, Fuentes-Cabrejo KM, O’Hanlon SJ, Jarvis JN, Loyse A,  
550 Meintjes G, Harrison TS, May RC, Fisher MC, Bicanic T. 2015. Genotypic diversity is  
551 associated with clinical outcome and phenotype in cryptococcal meningitis across  
552 Southern Africa. *PLoS Negl Trop Dis* 9:e0003847.
- 553 35. Bojarczuk A, Miller KA, Hotham R, Lewis A, Ogryzko N V., Kamuyango AA, Frost H, Gibson  
554 RH, Stillman E, May RC, Renshaw SA, Johnston SA. 2016. *Cryptococcus neoformans*  
555 intracellular proliferation and capsule size determines early macrophage control of  
556 Infection. *Sci Rep* 6:21489.
- 557 36. Zaragoza O, Chrisman CJ, Castelli MV, Frases S, Cuenca-Estrella M, Rodríguez-Tudela JL,  
558 Casadevall A. 2008. Capsule enlargement in *Cryptococcus neoformans* confers resistance  
559 to oxidative stress suggesting a mechanism for intracellular survival. *Cell Microbiol*  
560 10:2043–2057.
- 561 37. García-Rodas R, Casadevall A, Rodríguez-Tudela JL, Cuenca-Estrella M, Zaragoza O. 2011.  
562 *Cryptococcus neoformans* capsular enlargement and cellular gigantism during *Galleria*  
563 *mellonella* infection. *PLoS One* 6:e24485.

- 564 38. Robertson EJ, Najjuka G, Rolfes M a, Akampurira A, Jain N, Anantharanjit J, von  
565 Hohenberg M, Tassieri M, Carlsson A, Meya DB, Harrison TS, Fries BC, Boulware DR,  
566 Bicanic T. 2014. *Cryptococcus neoformans ex vivo* capsule size is associated with  
567 intracranial pressure and host immune response in HIV-associated cryptococcal  
568 meningitis. *J Infect Dis* 209:74–82.
- 569 39. Vecchiarelli A, Pericolini E, Gabrielli E, Chow S-K, Bistoni F, Cenci E, Casadevall A. 2011.  
570 *Cryptococcus neoformans* galactoxylomannan is a potent negative immunomodulator,  
571 inspiring new approaches in anti-inflammatory immunotherapy. *Immunotherapy* 3:997–  
572 1005.
- 573 40. Kronstad J, Saikia S, Nielson ED, Kretschmer M, Jung W, Hu G, Geddes JMH, Griffiths EJ,  
574 Choi J, Cadieux B, Caza M, Attarian R. 2012. Adaptation of *Cryptococcus neoformans* to  
575 mammalian hosts: integrated regulation of metabolism and virulence. *Eukaryot Cell*  
576 11:109–18.
- 577 41. Botts MR, Giles SS, Gates MA, Kozel TR, Hull CM. 2009. Isolation and characterization of  
578 *Cryptococcus neoformans* spores reveal a critical role for capsule biosynthesis genes in  
579 spore biogenesis. *Eukaryot Cell* 8:595–605.
- 580 42. Bódi Z, Farkas Z, Nevozhay D, Kalapis D, Lázár V, Csörgő B, Nyerges Á, Szamecz B, Fekete  
581 G, Papp B, Araújo H, Oliveira JL, Moura G, Santos MASS, Székely T, Balácsi G, Pál C. 2017.  
582 Phenotypic heterogeneity promotes adaptive evolution. *PLoS Biol* 15:e2000644.
- 583 43. Chow EWL, Morrow CA, Djordjevic JT, Wood IA, Fraser JA. 2012. Microevolution of  
584 *Cryptococcus neoformans* driven by massive tandem gene amplification. *Mol Biol Evol*

- 585 29:1987–2000.
- 586 44. Zaragoza O, Alvarez M, Telzak A, Rivera J, Casadevall A. 2007. The relative susceptibility  
587 of mouse strains to pulmonary *Cryptococcus neoformans* infection is associated with  
588 pleiotropic differences in the immune response. *Infect Immun* 75:2729–39.
- 589 45. Cheng P-Y, Sham A, Kronstad JW. 2009. *Cryptococcus gattii* isolates from the British  
590 Columbia cryptococcosis outbreak induce less protective inflammation in a murine  
591 model of infection than *Cryptococcus neoformans*. *Infect Immun* 77:4284–94.
- 592 46. Sellers RS, Clifford CB, Treuting PM, Brayton C. 2012. Immunological variation between  
593 inbred laboratory mouse strains: Points to consider in phenotyping genetically  
594 immunomodified mice. *Vet Pathol* 49:32–43.
- 595 47. Lortholary O, Improvisi L, Rayhane N, Gray F, Fitting C, Cavaillon JM, Dromer F. 1999.  
596 Cytokine profiles of AIDS patients are similar to those of mice with disseminated  
597 *Cryptococcus neoformans* infection. *Infect Immun* 67:6314–20.
- 598 48. Jain A V, Zhang Y, Fields WB, McNamara D a, Choe MY, Chen G-H, Erb-Downward J,  
599 Osterholzer JJ, Toews GB, Huffnagle GB, Olszewski M a. 2009. Th2 but not Th1 immune  
600 bias results in altered lung functions in a murine model of pulmonary *Cryptococcus*  
601 *neoformans* infection. *Infect Immun* 77:5389–99.
- 602 49. Koguchi Y, Kawakami K. 2002. Cryptococcal infection and Th1-Th2 cytokine balance. *Int*  
603 *Rev Immunol* 21:423–38.
- 604 50. Chaka W, Verheul AF, Vaishnav V V, Cherniak R, Scharringa J, Verhoef J, Snippe H,  
605 Hoepelman IM. 1997. *Cryptococcus neoformans* and cryptococcal glucuronoxylomannan,

- 606 galactoxylomannan, and mannoprotein induce different levels of tumor necrosis factor  
607 alpha in human peripheral blood mononuclear cells. *Infect Immun* 65:272–8.
- 608 51. Levitz SM, Tabuni A, Kornfeld H, Reardon CC, Golenbock DT. 1994. Production of tumor  
609 necrosis factor alpha in human leukocytes stimulated by *Cryptococcus neoformans*. *Infect*  
610 *Immun* 62:1975–81.
- 611 52. García-Rivera J, Casadevall A. 2001. Melanization of *Cryptococcus neoformans* reduces its  
612 susceptibility to the antimicrobial effects of silver nitrate. *Med Mycol* 39:353–357.

613

614

#### FIGURE LEGENDS

615 **Figure 1. *In vitro* induced capsule thickness and cell diameter of individual *Cryptococcus***  
616 ***neoformans* strains from Vietnam:** Cells were grown on DMEM medium/5% CO<sub>2</sub> and visually  
617 assessed by India ink staining. Images were taken for single cells measurement using ImageJ  
618 software. Capsule thickness is obtained by subtracting cell body diameter from total cell  
619 diameter. AFLP-VNI-γ/MLST-ST5 strains expressed higher degree of variation in both capsule  
620 size and cell diameter *in vitro*, which remains significant even when the outlier BMD1646 was  
621 removed from the analysis ( $p < 0.0001$  for both capsule and cell size, Fligner-Killeen test).  
622 Scattered plot represents single cells from an individual strain. Data for individual strains are  
623 presented as mean with error bars denoting standard deviation. Strains selected for experiment  
624 in mice were indicated by asterisks.

625

626 **Figure 2. Kaplan-Meier survival curves for mice infected with either ST5 (n = 5) or non-ST5 (n=**  
627 **3) *Cryptococcus neoformans* strains.** 10 mice were infected per strain (n = 80). Mice were  
628 monitored daily until the point of more than 15% weight loss or visible suffering and were then  
629 sacrificed by CO<sub>2</sub> inhalation. Mice infected with ST5 strains had statistically significantly longer  
630 survival times than those infected with non-ST5 strains (P<0.0001, Mantel-Cox log rank test).

631

632 **Figure 3. Fungal burden in lung and brain tissue at days 7, 14 and the point of impending**  
633 **death (mortality experiment) according to infecting genotype.** For day 7 and day 14, five mice  
634 were infected with each isolate (5 ST5 isolates and 3 ST4 isolates, N=80 in total). Mice were  
635 monitored daily. No mice needed to be sacrificed prior to Day 14 for distress. The fungal burden  
636 in non-ST5 infections was higher than in ST5 infections in both lung tissue at all time points, and  
637 in brain tissue at the point of sacrifice. For P values see text. Boxplots (Tukey's method)  
638 describe the median and interquartile range, the whiskers demarcate the largest or smallest  
639 values that were not outliers (black dots); outliers are defined as more than 1.5 times the  
640 interquartile range from the nearest quartile.

641

642 **Figure 4. Genotype-specific cytokine concentrations from lung homogenate of A/J mice at 7**  
643 **and 14 days post infection with  $5 \times 10^4$  *C. neoformans* cells/mouse.** Five mice were infected  
644 with each strain from each genotype at each time points. ST5 strains induced significantly  
645 higher levels of TNF- $\alpha$  at day 7, suggesting an earlier and more profound initial inflammatory  
646 response in infected mice. By day 14 mice infected with non-ST5 strains have higher levels

647 proinflammatory cytokines, probably a result of ST5 yeasts being cleared more rapidly from  
648 infected mice. The horizontal line within the box indicates the median; boundaries of the box  
649 indicate the 25<sup>th</sup> and 75<sup>th</sup> percentile and the whiskers indicate the highest and lowest values of  
650 the results; outliers are denoted as black dots (Tukey's method). Data are standardized as  
651 picograms of cytokine per gram lung tissue. Asterisks indicate statistically significant differences  
652 (Mann-Whitney test).

653

654 **Figure 5. Genotype-specific changes in cytokine concentrations from lung homogenate of A/J**  
655 **mice infected with *C. neoformans* between day 7 and day 14 post-infection.** Box and whisker  
656 plots (Tukey's method) compare levels of each cytokine between day 7 and day 14 for each  
657 genotype. Data are standardized as picograms of cytokine per gram lung tissue. Asterisks  
658 indicate statistically significant differences (Mann-Whitney test).

659

660 **Figure 6. Periodic Acid Schiff (PAS) staining of pulmonary tissue from mice infected with**  
661 **BMD1338 and BMD1415 on days 7 and 14.** The two strains represent ST5 and non-ST5,  
662 respectively. A/J mice were inoculated intranasally with  $5 \times 10^4$  yeast cells. Lung specimens were  
663 harvested at days 7 and 14 for histopathological examination. Photomicrographs were obtained  
664 at 200X magnification; the scale bar represents 215  $\mu\text{m}$ ). (A-B): lung sections from mice infected  
665 with BMD1338 (VNI- $\gamma$ /ST5) at day 7 and day 14, respectively. (C-D): lung sections from mice  
666 infected with BMD1415 (VNI- $\delta$ /ST4) at day 7 and day 14, respectively. Perivascular infiltration  
667 (red arrows) and necrosis are more marked by day 14 for both strains. Encapsulated yeasts



668 (yellow arrows), notable for the larger cell size and capsule thickness of BMD 1338 compared  
669 with BMD1415.

670

671 **Figure 7. Mucicarmine staining of capsular material in paraffin-embedded mice pulmonary**  
672 **tissue.**

673 Uninflated lung specimens were harvested from mice as described in the methods.  
674 Mucicarmine staining was performed to visualize the cryptococcal capsule. Photomicrographs  
675 were captured at 400X magnification with scale bar indicating 55µm. Capsular polysaccharide is  
676 stained pink (indicated by blue arrows), demonstrating diffuse localization consistent with  
677 extensive capsule production by yeasts in the alveolar space.

678

679

680

681

682

683

684

685

686

687

688

689

690

691

692

693

694

**TABLES**

695 **TABLE 1** *Cryptococcus neoformans* isolate clinical source and typing (n=30).

| Isolate data |             |               |      | Patient data       |     |
|--------------|-------------|---------------|------|--------------------|-----|
| Order        | Strain name | AFLP cluster  | MLST | Underlying Disease | Sex |
| 1            | BK14        | VNI- $\delta$ | 4    | HIV                | M   |
| 2            | BK163       | VNI- $\delta$ | 4    | HIV                | M   |
| 4            | BK225       | VNI- $\delta$ | 4    | HIV                | M   |
| 6            | BK48        | VNI- $\delta$ | 4    | HIV                | M   |
| 7            | BK59        | VNI- $\delta$ | 4    | HIV                | F   |
| 8            | BK69        | VNI- $\delta$ | 4    | HIV                | M   |
| 9            | BK74        | VNI- $\delta$ | 4    | HIV                | M   |
| 10           | BK80*       | VNI- $\delta$ | 4    | HIV                | M   |
| 11           | BK87        | VNI- $\delta$ | 4    | HIV                | M   |
| 12           | BK88        | VNI- $\delta$ | 4    | HIV                | M   |
| 13           | BK89        | VNI- $\delta$ | 4    | HIV                | M   |
| 15           | BMD1415*    | VNI- $\delta$ | 4    | Lupus              | M   |
| 3            | BK218       | VNI- $\delta$ | 6    | HIV                | M   |
| 5            | BK234       | VNI- $\delta$ | 6    | HIV                | F   |
| 14           | BMD1367*    | VNI- $\delta$ | 306  | Gastric cancer     | F   |
| 16           | BK147*      | VNI- $\gamma$ | 5    | HIV                | M   |
| 17           | BK44*       | VNI- $\gamma$ | 5    | HIV                | M   |
| 18           | BMD101      | VNI- $\gamma$ | 5    | None known         | M   |
| 19           | BMD1228     | VNI- $\gamma$ | 5    | None known         | F   |
| 20           | BMD1291     | VNI- $\gamma$ | 5    | None known         | F   |
| 21           | BMD1338*    | VNI- $\gamma$ | 5    | None known         | M   |
| 22           | BMD1353     | VNI- $\gamma$ | 5    | None known         | M   |
| 23           | BMD1452     | VNI- $\gamma$ | 5    | None known         | F   |
| 24           | BMD1646*    | VNI- $\gamma$ | 5    | None known         | M   |
| 25           | BMD1716     | VNI- $\gamma$ | 5    | None known         | F   |
| 26           | BMD367      | VNI- $\gamma$ | 5    | None known         | M   |
| 27           | BMD673      | VNI- $\gamma$ | 5    | None known         | F   |

|    |         |       |   |            |       |
|----|---------|-------|---|------------|-------|
| 28 | BMD700* | VNI-γ | 5 | None known | M 696 |
| 29 | BMD854  | VNI-γ | 5 | None known | F 697 |
| 30 | BMD899  | VNI-γ | 5 | None known | F 698 |

699

AFLP = amplified fragment length polymorphism

700

MLST = multi locus sequence typing

701 **TABLE**

M = Male, F = Female

702 **2**

\* indicates isolates selected for mouse experiment

703 Variabi

704 lity in *in vitro* capsule thickness and cell diameter of *Cryptococcus neoformans* strains by Sequence Type

705 (ST)

706

| Variable                                  | MLST Group    |              |
|-------------------------------------------|---------------|--------------|
|                                           | ST5           | Non-ST5      |
| <b>Capsule Thickness (μm)</b>             |               |              |
| Mean*                                     | 2.64          | 2.01         |
| 95% CI                                    | 2.49 - 2.79   | 1.94 - 2.07  |
| Range                                     | 0.01 - 9.56   | 0.02 - 6.16  |
| Coefficient of Variation <sup>§</sup> (%) | 0.63          | 0.37         |
| <b>Cell diameter (μm)</b>                 |               |              |
| Mean*                                     | 11.38         | 9.69         |
| 95% CI of Mean                            | 10.96 - 11.79 | 9.52 - 9.87  |
| Range                                     | 4.74 - 27.22  | 5.25 - 19.89 |
| Coefficient of Variation <sup>§</sup> (%) | 0.41          | 0.20         |

707 \*  $P < 0.0001$ , *t*-test with Welch's correction.

708 <sup>§</sup>  $P < 0.0001$ , *Fligner-Killeen* test of homogeneity of variance.

709

710

711 **TABLE 3** Tissue fungal burden in lung and brains of mice at days 7, 14 and at time of death by infecting

712 MLST Sequence Type (ST)

| <b>Fungal burden</b>                                             |                       |                        |                |
|------------------------------------------------------------------|-----------------------|------------------------|----------------|
| (Mean log <sub>10</sub> colony forming units per gram of tissue) |                       |                        |                |
| [95%CI]                                                          |                       |                        |                |
| <b>Tissue</b>                                                    | <b>ST5</b>            | <b>Non-ST5</b>         | <b>P Value</b> |
| Lung (Day 7)                                                     | 4.96<br>[3.86 - 6.05] | 7.07<br>[6.85 - 7.29]* | <0.001         |
| Brain (Day 7)                                                    | 0.81<br>[0.38 - 1.24] | 1.59<br>[0.87 - 2.30]  | 0.054          |
| Lung (Day 14)                                                    | 5.48<br>[4.34 - 6.62] | 8.00<br>[7.77 - 8.23]* | <0.0001        |
| Brain (Day 14)                                                   | 1.56<br>[0.81 - 2.31] | 1.91<br>[1.12 - 2.69]  | 0.36           |
| Lung (Death)                                                     | 3.81<br>[3.05 - 4.57] | 6.53<br>[6.30 - 6.76]* | <0.0001        |
| Brain (Death)                                                    | 2.90<br>[2.23 - 3.56] | 4.29<br>[3.90 - 4.68]* | 0.01           |

*\*Mann-Whitney test.*

713

714

715

716

717

718

719

720 **TABLE 4:** Cytokine concentrations from lung homogenate of infected mice at day 7 and day 14 post-  
 721 infection according to infecting *Cryptococcus neoformans* Sequence Type (ST)

| Cytokine                   | Mean cytokine concentration<br>(pg per gram of lung tissue)<br>[95%CI] |                                | *P Value<br>(ST5 vs non-ST5)   |                 |
|----------------------------|------------------------------------------------------------------------|--------------------------------|--------------------------------|-----------------|
|                            | ST5                                                                    | Non-ST5                        |                                |                 |
| <b>Day 7</b>               |                                                                        |                                |                                |                 |
| Th-1                       | IL-12                                                                  | 853.12<br>[750.50 - 955.80]    | 822.87<br>[608.90 - 1037.00]   | 0.30            |
|                            | IFN- $\gamma$                                                          | 136.02<br>[115.00 - 157.00]    | 150.59<br>[105.80 - 195.30]    | 0.97            |
|                            | TNF- $\alpha$                                                          | 3933.71<br>[3486.00 - 4381.00] | 3256.25<br>[2630.00 - 3882.00] | <b>0.01</b>     |
| Th-2                       | IL-4                                                                   | 230.79<br>[162.80 - 298.80]    | 253.24<br>[11.60 - 349.90]     | 0.92            |
|                            | IL-5                                                                   | 561.05<br>[369.00 - 753.10]    | 459.85<br>[344.40 - 575.40]    | 0.91            |
|                            | IL-10                                                                  | 145.01<br>[128.20 - 161.80]    | 139.99<br>[119.30 - 160.70]    | 0.68            |
| Th-17                      | IL-17                                                                  | 268.48<br>[155.90 - 381.00]    | 243.41<br>[165.60 - 321.20]    | 0.24            |
| TNF- $\alpha$ /IL-10 ratio |                                                                        | 27.13                          | 23.26                          | ND              |
| <b>Day 14</b>              |                                                                        |                                |                                |                 |
| Th-1                       | IL-12                                                                  | 547.84<br>[412.40 - 683.30]    | 213.72<br>[120.50 - 306.90]    | <b>&lt;0.01</b> |
|                            | IFN- $\gamma$                                                          | 91.2<br>[57.25 - 125.20]       | 1760.67<br>[166.50 - 3355.00]  | 0.09            |
|                            | TNF- $\alpha$                                                          | 2802.36<br>[2385.00 - 3220.00] | 6378.76<br>[3374.00 - 9384.00] | <b>&lt;0.01</b> |
| Th-2                       | IL-4                                                                   | 1154.72<br>[673.50 - 636.00]   | 800.35<br>[604.70 - 996.00]    | 0.60            |
|                            | IL-5                                                                   | 294.6<br>[170.40 - 418.80]     | 347.55<br>[279.20 - 415.90]    | 0.15            |
|                            | IL-10                                                                  | 132.76<br>[102.10 - 163.40]    | 220.15<br>[172.40 - 267.90]    | <b>0.01</b>     |
| Th-17                      | IL-17                                                                  | 175.75<br>[65.54 - 286.00]     | 1012.49<br>[459.20 - 1566.00]  | <b>0.01</b>     |
| TNF- $\alpha$ /IL-10 ratio |                                                                        | 21.11                          | 28.97                          | ND              |

722 \* *Mann-Whitney test. ND: not done*

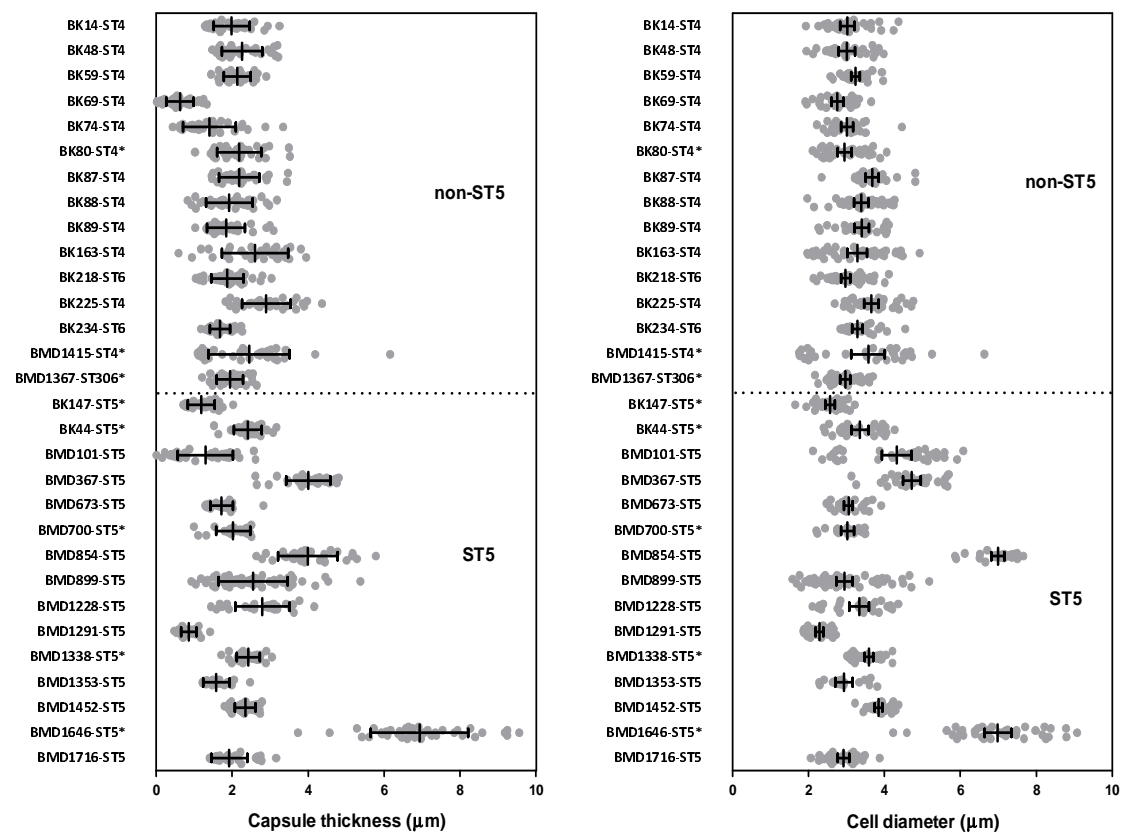

**Figure 1.** *In vitro* induced capsule thickness and cell diameter of individual *Cryptococcus neoformans* strains from Vietnam: Cells were grown on DMEM medium/5% CO<sub>2</sub> and visually assessed by India ink staining. Images were taken for single cells measurement using ImageJ software. Capsule thickness is obtained by subtracting cell body diameter from total cell diameter. AFLP-VNI-γ/MLST-ST5 strains expressed higher degree of variation in both capsule size and cell diameter *in vitro*, which remains significant even when the outlier BMD1646 was removed from the

analysis ( $p < 0.0001$  for both capsule and cell size, Fligner-Killeen test). Scattered plot represents single cells from an individual strain. Data for individual strains are presented as mean with error bars denoting standard deviation. Strains selected for experiment in mice were indicated by asterisks.



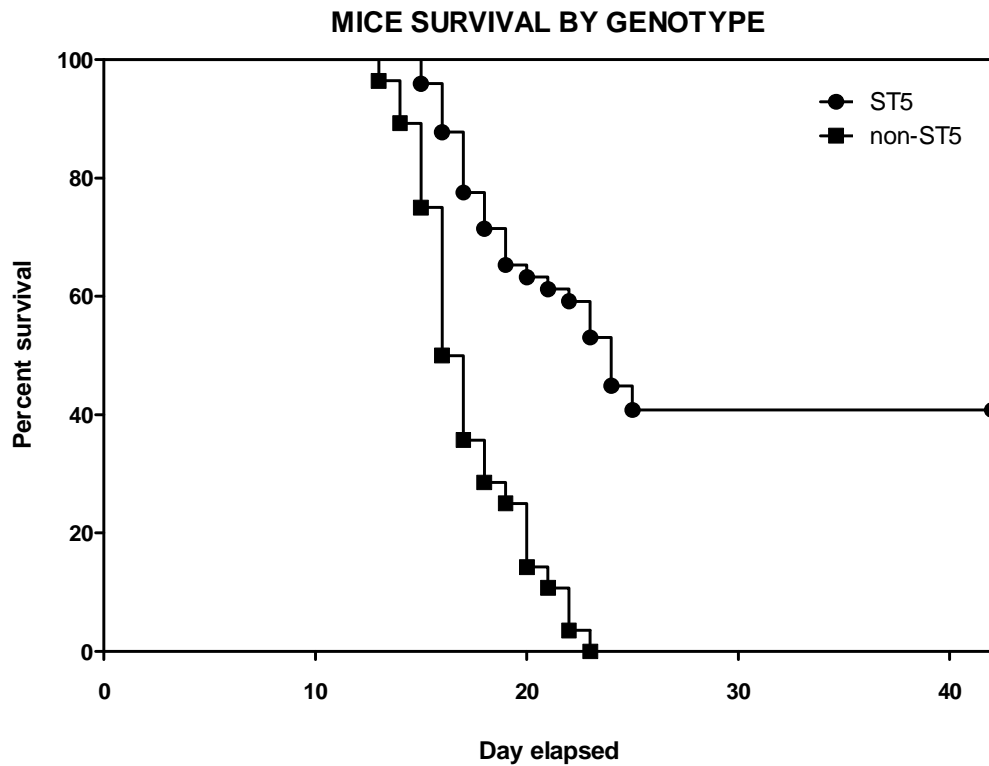

**Figure 2.** Kaplan-Meier survival curves for mice infected with either ST5 (n = 5) or non-ST5 (n= 3) *Cryptococcus neoformans* strains. 10 mice were infected per strain (n = 80). Mice were monitored daily until the point of more than 15% weight loss or visible suffering and were then sacrificed by CO<sub>2</sub> inhalation. Mice infected with ST5 strains had statistically significantly longer survival times than those infected with non-ST5 strains (P<0.0001, Mantel-Cox log rank test).

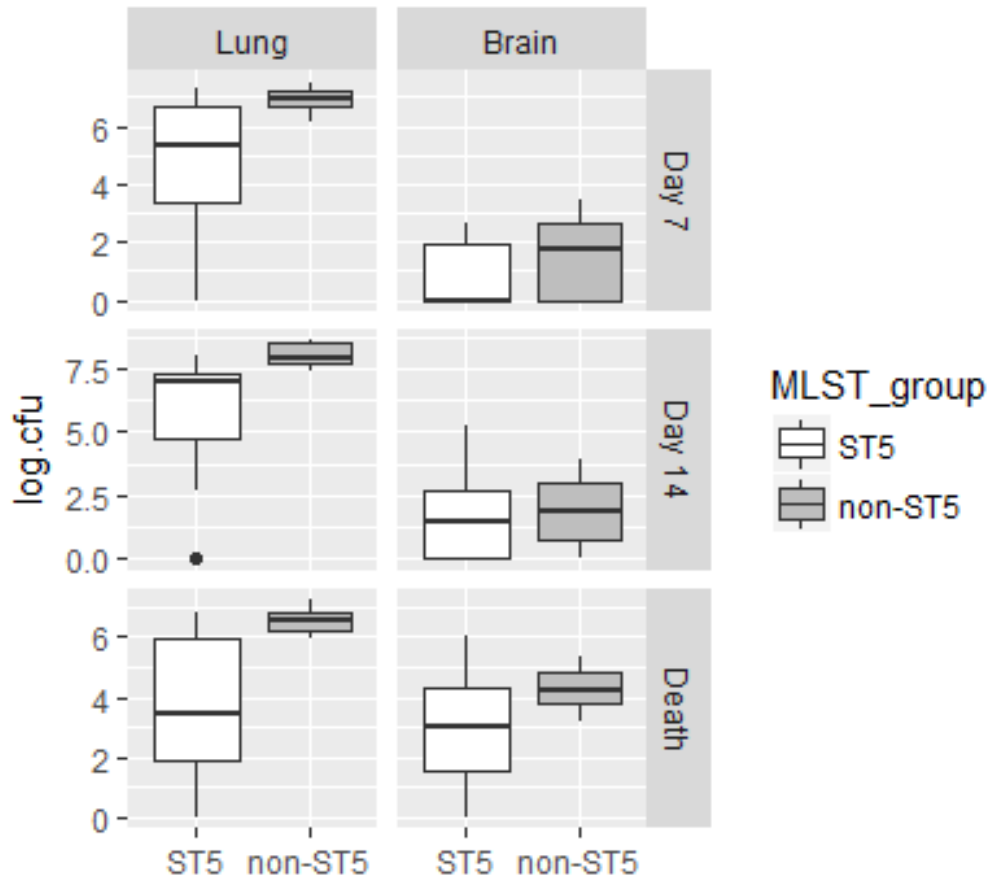

**Figure 3. Fungal burden in lung and brain tissue at days 7, 14 and the point of impending death (mortality experiment) according to infecting genotype.** For day 7 and day 14, five mice were infected with each isolate (5 ST5 isolates and 3 ST4 isolates, N=80 in total). Mice were monitored daily. No mice needed to be sacrificed prior to Day 14 for distress. The fungal burden in non-ST5 infections was higher than in ST5

infections in both lung tissue at all time points, and in brain tissue at the point of sacrifice. For P values see text. Boxplots (Tukey's method) describe the median and interquartile range, the whiskers demarcate the largest or smallest values that were not outliers (black dots); outliers are defined as more than 1.5 times the interquartile range from the nearest quartile.

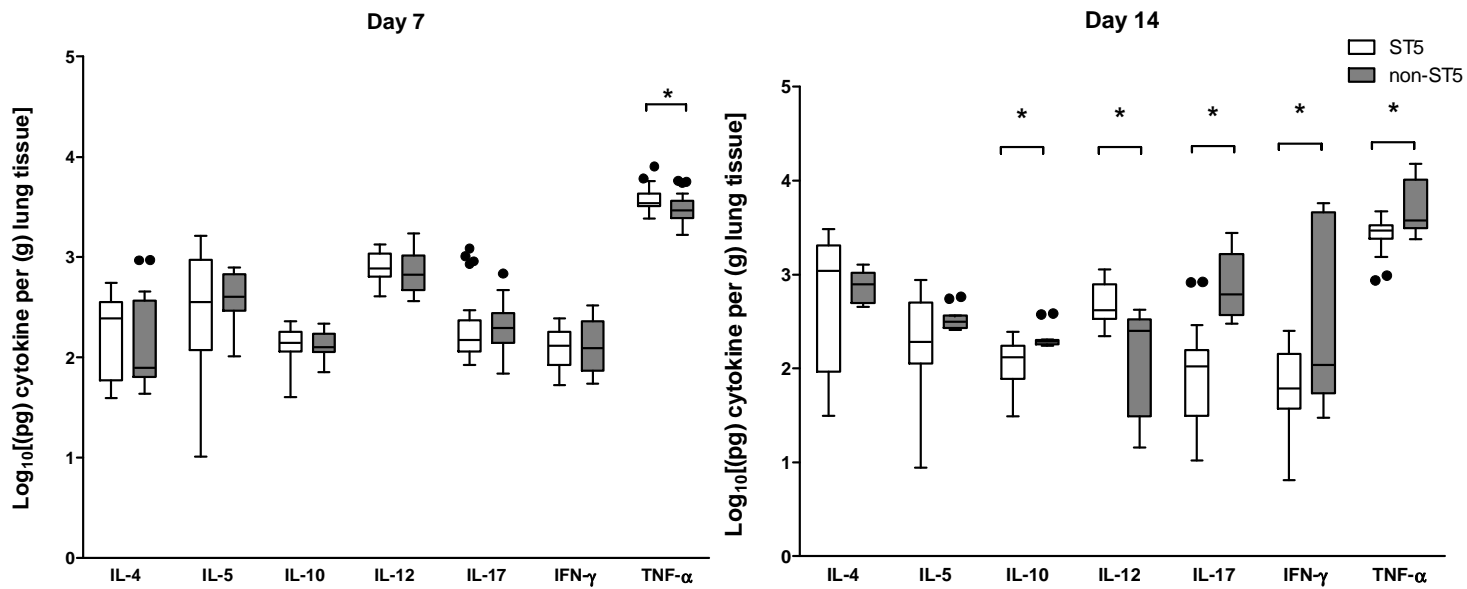

**Figure 4. Genotype-specific cytokine concentrations from lung homogenate of A/J mice at 7 and 14 days post infection with  $5 \times 10^4$  *C.***

***neoformans* cells/mouse.** Five mice were infected with each strain from each genotype at each time points. ST5 strains induced significantly higher levels of TNF- $\alpha$  at day 7, suggesting an earlier and more profound initial inflammatory response in infected mice. By day 14 mice infected with non-ST5 strains have higher levels proinflammatory cytokines, probably a result of ST5 yeasts being cleared more rapidly from infected mice. The horizontal line within the box indicates the median; boundaries of the box indicate the 25<sup>th</sup> and 75<sup>th</sup> percentile and the whiskers

indicate the highest and lowest values of the results; outliers are denoted as black dots (Tukey's method). Data are standardized as picograms of cytokine per gram lung tissue. Asterisks indicate statistically significant differences (Mann-Whitney test).

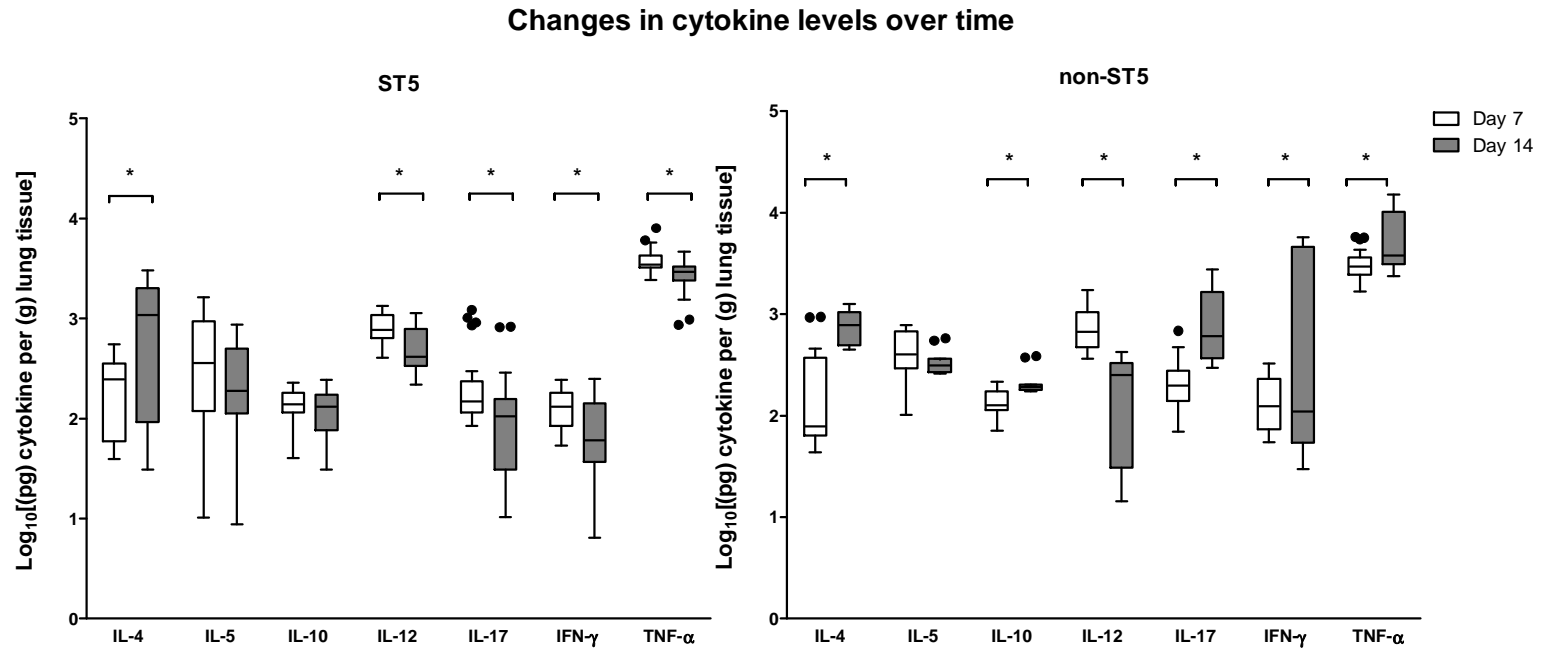

**Figure 5. Genotype-specific changes in cytokine concentrations from lung homogenate of A/J mice infected with *C. neoformans* between day 7 and day 14 post-infection.** Box and whisker plots (Tukey's method) compare levels of each cytokine between day 7 and day 14 for each genotype. Data are standardized as picograms of cytokine per gram lung tissue. Asterisks indicate statistically significant differences (Mann-Whitney test).



**Day 7**

**Day 14**

**BMD1338  
VNI- $\gamma$ /ST5**

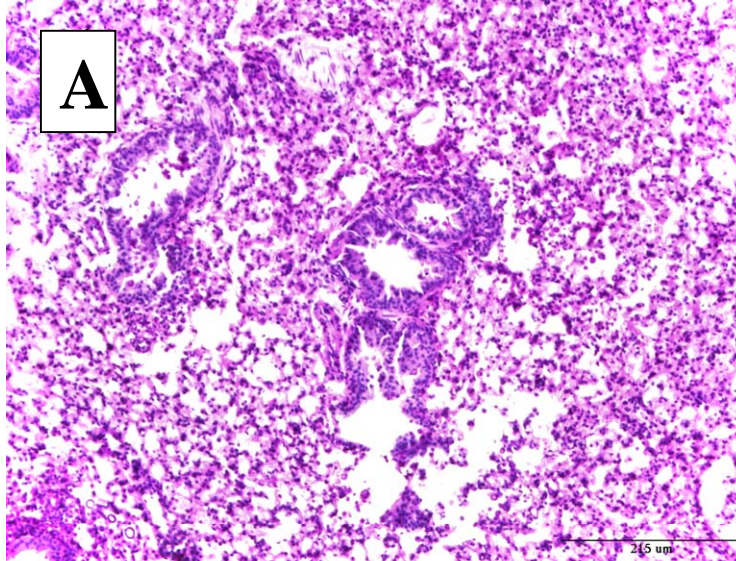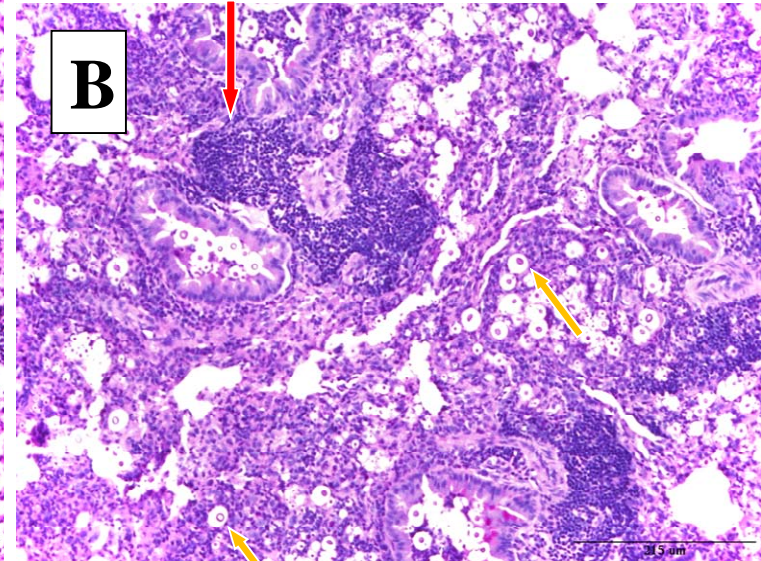

**BMD1415  
VNI- $\delta$ /ST4**

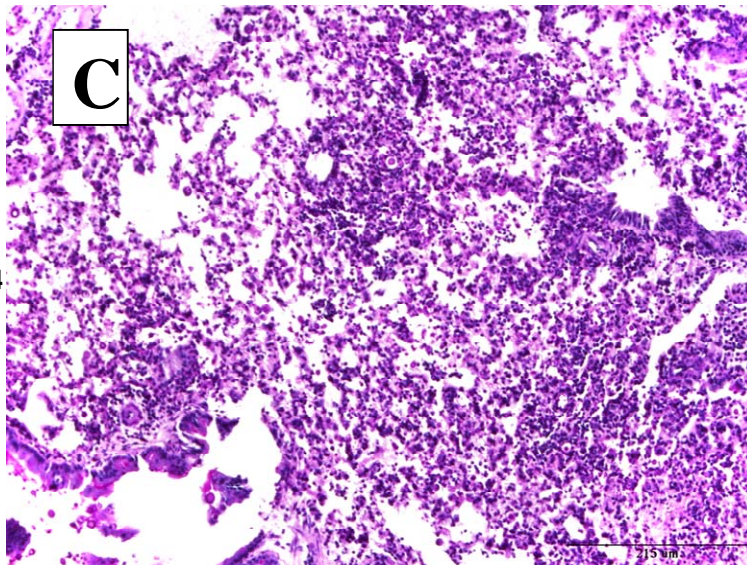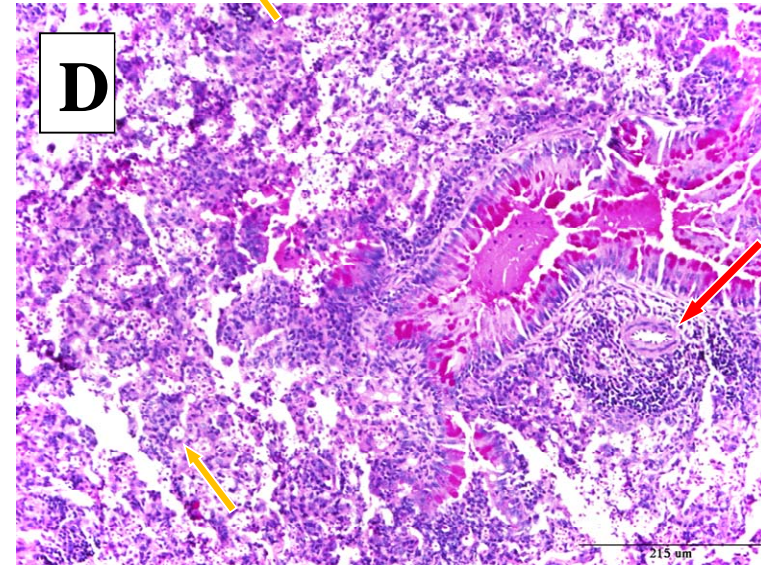

**Figure 6. Periodic Acid Schiff (PAS) staining of pulmonary tissue from mice infected with BMD1338 and BMD1415 on days 7 and 14.** The two strains represent ST5 and non-ST5, respectively. A/J mice were inoculated intranasally with  $5 \times 10^4$  yeast cells. Lung specimens were harvested at days 7 and 14 for histopathological examination. Photomicrographs were obtained at 200X magnification; the scale bar represents 215  $\mu\text{m}$ ). (A-B): lung sections from mice infected with BMD1338 (VNI- $\gamma$ /ST5) at day 7 and day 14, respectively. (C-D): lung sections from mice infected with BMD1415 (VNI- $\delta$ /ST4) at day 7 and day 14, respectively. Perivascular infiltration (red arrows) and necrosis are more marked by day 14 for both strains. Encapsulated yeasts (yellow arrows), notable for the larger cell size and capsule thickness of BMD 1338 compared with BMD1415.



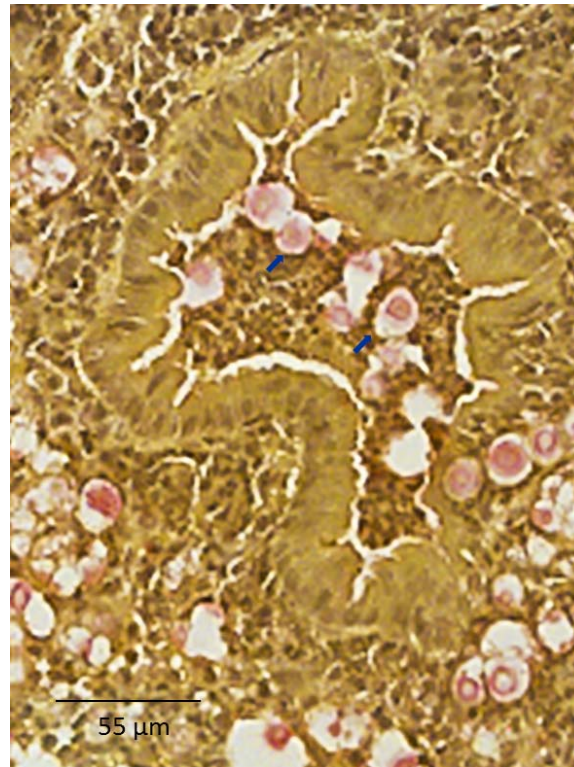

**Figure 7. Mucicarmine staining of capsular material in paraffin-embedded mice pulmonary tissue.**

Uninflated lung specimens were harvested from mice as described in the methods. Mucicarmine staining was performed to visualize the cryptococcal capsule. Photomicrographs were captured at 400X magnification with scale bar indicating 55μm. Capsular polysaccharide is stained pink (indicated by blue arrows), demonstrating diffuse localization consistent with extensive capsule production by yeasts in the alveolar space.
